# Supplementary material for: First 3D Dental Topographic Analysis of the Enamel-Dentine Junction in Non-Primate Euarchontans: Contribution of the Enamel-Dentine Junction to Molar Morphology
Source: Springer Nature journal article supplement (doi:10.1007/s10914-018-9440-2), 2018-06-02
Supplement: 10914_2018_9440_MOESM1_ESM.pdf [file 10914_2018_9440_MOESM1_ESM.pdf]

**Table S1.** Wear stages, correlation coefficients (r), voxel sizes, and MorphoSource codes for the specimens included in the study

| Specimen Number | Species                                     | Wear            | r <sup>DNE</sup> | r <sup>OPCR</sup> | r <sup>RFI</sup> | Voxel Size | MorphoSource Code (If Applicable) |
|-----------------|---------------------------------------------|-----------------|------------------|-------------------|------------------|------------|-----------------------------------|
| EA 127          | <i>Galeopterus variegatus</i>               | Moderately Worn | 0.719658361      | 0.986175115       | 0.975601065      | 0.0358851  | M9544-13209                       |
| USNM 481103     | <i>Ptilocercus lowii</i>                    | Slightly Worn   | 0.787302019      | 0.968             | 0.967390006      | 0.0211156  | M6509-6388                        |
| USNM 481107     | <i>Ptilocercus lowii</i>                    | Not Worn        | 0.678460477      | 0.927299703       | 0.944366461      | 0.020191   | M6512-6391                        |
| USNM 481108     | <i>Ptilocercus lowii</i>                    | Not Worn        | 0.639041894      | 0.981530343       | 0.939864979      | 0.0215241  | M6519-6408                        |
| USNM 488052     | <i>Ptilocercus lowii</i>                    | Slightly Worn   | 0.745636165      | 0.977382876       | 0.936786255      | 0.0204943  | M6525-6415                        |
| USNM 488055     | <i>Ptilocercus lowii</i>                    | Not Worn        | 0.705199468      | 0.965354331       | 0.935297022      | 0.0208989  | M6528-6418                        |
| FMNH 46630      | <i>Dendrogale murina</i>                    | Slightly Worn   | 0.710169808      | 0.904347826       | 0.974902589      | 0.0200655  | N/A                               |
| FMNH 46629      | <i>Dendrogale murina*</i>                   | Not worn        | 0.711888494      | 0.833333333       | 0.980983207      | 0.0109702  | N/A                               |
| FMNH 49262      | <i>Dendrogale melanura</i>                  | Moderately Worn | 0.634518436      | 0.933060109       | 0.959411286      | 0.0185598  | N/A                               |
| MCZ 36390       | <i>Dendrogale melanura</i>                  | slightly worn   | 0.65564613       | 0.96042618        | 0.950920648      | 0.0158051  | N/A                               |
| FMNH 108854     | <i>Dendrogale melanura</i>                  | Highly worn     | 0.652612687      | 0.939233818       | 0.945749311      | 0.0208742  | N/A                               |
| FMNH 61419      | <i>Tupaia everetti</i>                      | Highly Worn     | 0.62733769       | 0.942513369       | 0.976589848      | 0.0331459  | N/A                               |
| USNM 311305     | <i>Tupaia glis</i>                          | Moderately Worn | 0.550861847      | 0.957968476       | 0.962960001      | 0.0172208  | M6502-6381                        |
| USNM 311311     | <i>Tupaia glis</i>                          | Not Worn        | 0.619756712      | 0.944630872       | 0.940043331      | 0.0275976  | M6702-6698                        |
| USNM 487950     | <i>Tupaia glis</i>                          | Moderately Worn | 0.699049611      | 0.983471074       | 0.942032344      | 0.0291413  | M6522-6411                        |
| USNM 112662     | <i>Tupaia glis</i>                          | Slightly Worn   | 0.670602146      | 1                 | 0.914767806      | 0.0263906  | M6559-6463                        |
| MPFIN 734 BABA  | <i>Tupaia belangeri</i>                     | Not worn        | 0.544011243      | 0.898021309       | 0.988982422      | 0.0262609  | M6514-6393                        |
| USNM 320655     | <i>Tupaia belangeri</i>                     | Not Worn        | 0.601896792      | 0.998381877       | 0.985043815      | 0.0287971  | M6680-6584                        |
| USNM 320666     | <i>Tupaia belangeri</i>                     | Slightly Worn   | 0.627523405      | 0.968333333       | 0.969208354      | 0.0270084  | M6705-6605                        |
| USNM 320680     | <i>Tupaia belangeri</i>                     | Slightly Worn   | 0.527957616      | 0.977917981       | 0.945454652      | 0.0282842  | M6707-6607                        |
| USNM 320689     | <i>Tupaia belangeri</i>                     | Slightly Worn   | 0.56162461       | 0.954391892       | 0.943584656      | 0.0291716  | M6505-6384                        |
| USNM 320690     | <i>Tupaia belangeri</i>                     | Slightly Worn   | 0.543521251      | 0.925445705       | 0.939453903      | 0.0283358  | M6709-6609                        |
| FMNH 62948      | <i>Tupaia palawanensis</i>                  | Slightly Worn   | 0.493987139      | 0.869210698       | 0.955059618      | 0.0233518  | N/A                               |
| FMNH 141464     | <i>Tupaia minor</i>                         | Slightly Worn   | 0.600377424      | 0.998287671       | 0.953994785      | 0.0223038  | N/A                               |
| FMNH 68793      | <i>Tupaia tana</i>                          | Moderately Worn | 0.700870904      | 0.907303371       | 0.971737032      | 0.0272784  | N/A                               |
| FMNH 108831     | <i>Tupaia montana</i>                       | Highly Worn     | 0.648820927      | 0.918719212       | 0.943413288      | 0.0223038  | N/A                               |
| AMNH M 216241   | <i>Otolemur crassicaudatus</i>              | Slightly Worn   | 0.560808924      | 0.94              | 0.947969532      | 0.0386383  | M10812-16240                      |
| AMNH M 216239   | <i>Otolemur crassicaudatus*</i>             | Moderately Worn | 0.861895904      | 1                 | 0.928520199      | 0.0167609  | M10793-16222                      |
| AMNH M 88061    | <i>Otolemur crassicaudatus</i> <sup>†</sup> | Slightly Worn   | 0.38252307       | 0.751861042       | 0.957013081      | 0.0208751  | M6486-6365                        |
| MCZ 17593       | <i>Euoticus elegantulus</i>                 | Moderately Worn | 0.652504337      | 0.92038835        | 0.979356615      | 0.026906   | M3104-2828                        |
| MCZ 46143       | <i>Euoticus elegantulus</i>                 | Slightly Worn   | 0.769997121      | 0.987854251       | 0.906062953      | 0.026906   | M3107-2830                        |
| MCZ 44918       | <i>Hapalemur griseus</i>                    | Slightly Worn   | 0.520594363      | 0.942664418       | 0.91954772       | 0.038685   | M2977-2709                        |
| MCZ 16354       | <i>Eulemur fulvus</i>                       | Slightly Worn   | 0.623662407      | 0.888268156       | 0.965369319      | 0.047648   | M2913-2648                        |
| MCZ 8044        | <i>Eulemur fulvus</i>                       | Slightly Worn   | 0.621872533      | 0.971326165       | 0.947333912      | 0.045991   | M3098-2822                        |

\*Indicates right tooth was used. All others were left.

<sup>†</sup>This specimen is identified as *Otolemur monteiri monteiri* in the AMNH database. However, further research is needed to determine the validity of separating *O. monteiri* from *O. crassicaudatus* per Grubb et al. (2003).

**Table S2.** Reconstructed correlation coefficients (r) and topographic values for euarchontans including Sundatheria

|                               | Nodes    |          |          |          |          |          |          |          |          |          |          |
|-------------------------------|----------|----------|----------|----------|----------|----------|----------|----------|----------|----------|----------|
|                               | 2        | 3        | 4        | 5        | 6        | 7        | 9        | 10       | 16       | 18       | 20       |
| <b>DNE</b> <sup>OES</sup>     | 303.1324 | 259.6837 | 339.5843 | 245.3946 | 195.591  | 232.3732 | 354.9149 | 329.1127 | 349.7813 | 337.3889 | 340.2051 |
| <b>3D-OPCR</b> <sup>OES</sup> | 73.70718 | 69.57664 | 77.37958 | 69.80999 | 63.99069 | 65.72833 | 78.43099 | 73.76909 | 76.59543 | 80.7     | 84.27242 |
| <b>RFI</b> <sup>OES</sup>     | 0.517612 | 0.492914 | 0.612757 | 0.473701 | 0.47856  | 0.477905 | 0.571303 | 0.637383 | 0.643329 | 0.611089 | 0.623594 |
| <b>DNE</b> <sup>EDJ</sup>     | 464.0993 | 421.9889 | 562.9347 | 424.7567 | 357.8204 | 383.3422 | 524.1446 | 529.5803 | 585.4453 | 554.3123 | 522.3622 |
| <b>3D-OPCR</b> <sup>EDJ</sup> | 75.33326 | 71.74623 | 82.33644 | 70.21734 | 72.29702 | 69.03078 | 81.17761 | 74.66129 | 78.68146 | 84.8393  | 86.23056 |
| <b>RFI</b> <sup>EDJ</sup>     | 0.506114 | 0.47474  | 0.599202 | 0.45411  | 0.45293  | 0.473532 | 0.554883 | 0.636171 | 0.634969 | 0.608396 | 0.596963 |
| <b>DNE</b> <sup>r</sup>       | 0.658243 | 0.629571 | 0.61451  | 0.587004 | 0.612174 | 0.610846 | 0.682842 | 0.62929  | 0.606182 | 0.61601  | 0.652754 |
| <b>OPCR</b> <sup>r</sup>      | 0.952359 | 0.940654 | 0.930954 | 0.938694 | 0.905693 | 0.932763 | 0.953656 | 0.968211 | 0.954984 | 0.942817 | 0.938053 |
| <b>RFI</b> <sup>r</sup>       | 0.953616 | 0.945508 | 0.960371 | 0.938484 | 0.944482 | 0.950396 | 0.955958 | 0.943211 | 0.956252 | 0.964404 | 0.954591 |

**Table S2.** Continued

|                               | Nodes    |          |          |          |          |          |          |          |          |          |          |
|-------------------------------|----------|----------|----------|----------|----------|----------|----------|----------|----------|----------|----------|
|                               | 22       | 24       | 26       | 29       | 30       | 34       | 37       | 38       | 40       | 41       | 42       |
| <b>DNE</b> <sup>OES</sup>     | 230.524  | 346.5811 | 236.2973 | 333.8012 | 375.5476 | 332.8825 | 382.8423 | 338.7483 | 317.2241 | 333.3483 | 342.6158 |
| <b>3D-OPCR</b> <sup>OES</sup> | 65.21275 | 77.83773 | 62.07092 | 83.55379 | 79.57183 | 76.66137 | 75.3172  | 73.55532 | 71.36323 | 77.83969 | 77.88342 |
| <b>RFI</b> <sup>OES</sup>     | 0.48743  | 0.542309 | 0.490817 | 0.586348 | 0.567964 | 0.608189 | 0.681516 | 0.623544 | 0.653319 | 0.62685  | 0.603637 |
| <b>DNE</b> <sup>EDJ</sup>     | 377.1108 | 506.2096 | 351.5229 | 514.9377 | 536.0664 | 554.1422 | 672.4433 | 604.334  | 457.6616 | 503.3938 | 530.1577 |
| <b>3D-OPCR</b> <sup>EDJ</sup> | 69.6881  | 78.92029 | 65.02103 | 90.57078 | 82.50877 | 81.21235 | 76.54378 | 80.06626 | 80.05742 | 82.79725 | 82.10377 |
| <b>RFI</b> <sup>EDJ</sup>     | 0.463996 | 0.537488 | 0.464318 | 0.562515 | 0.538949 | 0.583303 | 0.66034  | 0.600998 | 0.646475 | 0.61055  | 0.588212 |
| <b>DNE</b> <sup>r</sup>       | 0.643467 | 0.686914 | 0.688656 | 0.652722 | 0.706414 | 0.608475 | 0.573245 | 0.572324 | 0.696766 | 0.668239 | 0.655197 |
| <b>OPCR</b> <sup>r</sup>      | 0.930911 | 0.964063 | 0.946384 | 0.923962 | 0.962204 | 0.945864 | 0.953925 | 0.915343 | 0.885725 | 0.919493 | 0.934701 |
| <b>RFI</b> <sup>r</sup>       | 0.944424 | 0.961725 | 0.943281 | 0.957077 | 0.94661  | 0.956081 | 0.96114  | 0.95717  | 0.972723 | 0.962284 | 0.959537 |

**Table S3.** Reconstructed correlation coefficients (r) and topographic values for euarchontans including Primatomorpha

|                               | Nodes    |          |          |          |          |          |          |          |          |          |          |
|-------------------------------|----------|----------|----------|----------|----------|----------|----------|----------|----------|----------|----------|
|                               | 2        | 3        | 4        | 5        | 9        | 10       | 13       | 17       | 20       | 26       | 27       |
| <b>DNE</b> <sup>OES</sup>     | 342.9699 | 272.9881 | 250.3838 | 234.0362 | 236.0293 | 238.1324 | 196.9673 | 353.3885 | 375.2932 | 341.9023 | 333.0531 |
| <b>3D-OPCR</b> <sup>OES</sup> | 77.39239 | 70.85867 | 70.29075 | 65.88858 | 65.74324 | 62.24774 | 64.12331 | 78.24276 | 79.54046 | 77.79543 | 77.80328 |
| <b>RFI</b> <sup>OES</sup>     | 0.552693 | 0.498378 | 0.475750 | 0.478587 | 0.489691 | 0.491570 | 0.479125 | 0.575692 | 0.568695 | 0.605688 | 0.627698 |
| <b>DNE</b> <sup>EDJ</sup>     | 507.7641 | 434.0309 | 429.2724 | 384.8474 | 382.0936 | 353.1838 | 359.0661 | 524.8016 | 536.1759 | 530.4648 | 503.5209 |
| <b>3D-OPCR</b> <sup>EDJ</sup> | 79.42679 | 72.70888 | 70.57833 | 69.15111 | 70.08643 | 65.15381 | 72.39660 | 81.39169 | 82.54444 | 82.20383 | 82.83865 |
| <b>RFI</b> <sup>EDJ</sup>     | 0.540714 | 0.483363 | 0.457343 | 0.474610 | 0.467564 | 0.465507 | 0.453822 | 0.556246 | 0.539176 | 0.588848 | 0.610813 |
| <b>DNE</b> <sup>r</sup>       | 0.679623 | 0.639178 | 0.590606 | 0.612047 | 0.647442 | 0.689981 | 0.613167 | 0.679759 | 0.7059   | 0.653756 | 0.667642 |
| <b>OPCR</b> <sup>r</sup>      | 0.956603 | 0.945332 | 0.940448 | 0.933347 | 0.932846 | 0.947029 | 0.906176 | 0.950502 | 0.961678 | 0.933227 | 0.918883 |
| <b>RFI</b> <sup>r</sup>       | 0.957296 | 0.948624 | 0.939652 | 0.950785 | 0.945713 | 0.943710 | 0.944803 | 0.954085 | 0.946298 | 0.958662 | 0.961921 |

**Table S3.** Continued

|                               | Nodes    |          |          |          |          |          |          |          |          |          |          |
|-------------------------------|----------|----------|----------|----------|----------|----------|----------|----------|----------|----------|----------|
|                               | 28       | 31       | 35       | 36       | 37       | 38       | 45       | 51       | 52       | 53       | 58       |
| <b>DNE</b> <sup>OES</sup>     | 317.1257 | 340.1312 | 339.2655 | 337.2673 | 349.7355 | 382.8357 | 329.1035 | 338.6268 | 332.8369 | 333.7859 | 332.5513 |
| <b>3D-OPCR</b> <sup>OES</sup> | 71.35109 | 84.26332 | 77.34026 | 80.68501 | 76.58979 | 75.31639 | 73.76795 | 73.54033 | 76.65575 | 83.55191 | 76.54202 |
| <b>RFI</b> <sup>OES</sup>     | 0.653601 | 0.623806 | 0.613673 | 0.611438 | 0.643460 | 0.681534 | 0.637409 | 0.623893 | 0.608319 | 0.586392 | 0.529695 |
| <b>DNE</b> <sup>EDJ</sup>     | 457.7039 | 522.3939 | 563.0719 | 554.3646 | 585.4649 | 672.4461 | 529.5841 | 604.3862 | 554.1618 | 514.9442 | 490.7267 |
| <b>3D-OPCR</b> <sup>EDJ</sup> | 80.07121 | 86.24091 | 82.38115 | 84.85634 | 78.68787 | 76.54469 | 74.66257 | 80.08329 | 81.21873 | 90.57291 | 77.46189 |
| <b>RFI</b> <sup>EDJ</sup>     | 0.646562 | 0.597029 | 0.599486 | 0.608504 | 0.635009 | 0.660345 | 0.636179 | 0.601106 | 0.583343 | 0.562528 | 0.525181 |
| <b>DNE</b> <sup>r</sup>       | 0.696567 | 0.652605 | 0.613866 | 0.615764 | 0.606089 | 0.573232 | 0.629271 | 0.572078 | 0.608382 | 0.652691 | 0.679486 |
| <b>OPCR</b> <sup>r</sup>      | 0.885521 | 0.937900 | 0.930295 | 0.942566 | 0.954889 | 0.953911 | 0.968192 | 0.915091 | 0.945770 | 0.923930 | 0.962703 |
| <b>RFI</b> <sup>r</sup>       | 0.97260  | 0.95450  | 0.959979 | 0.964255 | 0.956195 | 0.961131 | 0.943199 | 0.957021 | 0.956024 | 0.957058 | 0.960507 |

**Table S4.** Reconstructed correlation coefficients ( $r$ ) for Sundatheria and Primatomorpha showing the effect of removing the highly worn specimens from the ancestral state reconstruction analysis. Note that the differences are very minor.

| <b>Tree supporting Sundatheria:</b>   | <b>Including Worn Teeth</b> |                |            | <b>Excluding Worn Teeth</b> |                |            |
|---------------------------------------|-----------------------------|----------------|------------|-----------------------------|----------------|------------|
|                                       | <b>DNE</b>                  | <b>3D-OPCR</b> | <b>RFI</b> | <b>DNE</b>                  | <b>3D-OPCR</b> | <b>RFI</b> |
| Tupaïid ancestor                      | 0.65519692                  | 0.93470087     | 0.95953739 | 0.65558253                  | 0.93657794     | 0.95709855 |
| Scandentian ancestor                  | 0.68284158                  | 0.95365603     | 0.95595761 | 0.68300169                  | 0.95443538     | 0.95494502 |
| Sundatherian ancestor                 | 0.68691423                  | 0.96406335     | 0.96172505 | 0.68698225                  | 0.96439444     | 0.96129488 |
| Euarchontan ancestor                  | 0.65824274                  | 0.9523589      | 0.95361649 | 0.65828669                  | 0.95257281     | 0.95333855 |
| Lemurid ancestor                      | 0.58700398                  | 0.93869387     | 0.93848377 | 0.58701143                  | 0.93873014     | 0.93843663 |
| Galagid ancestor                      | 0.64346706                  | 0.93091058     | 0.94442351 | 0.64347528                  | 0.93095061     | 0.9443715  |
| Strepsirrhine ancestor                | 0.62957126                  | 0.94065445     | 0.94550792 | 0.62959113                  | 0.94075119     | 0.94538223 |
| <b>Tree supporting Primatomorpha:</b> |                             |                |            |                             |                |            |
|                                       | <b>DNE</b>                  | <b>3D-OPCR</b> | <b>RFI</b> | <b>DNE</b>                  | <b>3D-OPCR</b> | <b>RFI</b> |
| Tupaïid ancestor                      | 0.65375648                  | 0.933227       | 0.95866245 | 0.65413974                  | 0.93513446     | 0.95616306 |
| Scandentian ancestor                  | 0.67975995                  | 0.95050289     | 0.9540858  | 0.67993328                  | 0.95136551     | 0.9529555  |
| Euarchontan ancestor                  | 0.67962339                  | 0.95660332     | 0.95729654 | 0.67973121                  | 0.95713995     | 0.95659339 |
| Lemurid ancestor                      | 0.59060677                  | 0.94044826     | 0.93965238 | 0.59061395                  | 0.94048398     | 0.93960558 |
| Galagid ancestor                      | 0.64744256                  | 0.93284646     | 0.94571301 | 0.64745048                  | 0.93288588     | 0.94566137 |
| Strepsirrhine ancestor                | 0.63917872                  | 0.94533282     | 0.94862422 | 0.63919786                  | 0.94542808     | 0.94849941 |
| Primatomorphan ancestor               | 0.67948682                  | 0.96270375     | 0.96050728 | 0.67952914                  | 0.96291438     | 0.96023129 |

**Fig. S1** Phylogenetic relationships among selected euarchontans including Sundatheria. Refer to Table S1 for reconstructed correlation coefficient ( $r$ ) at each node.

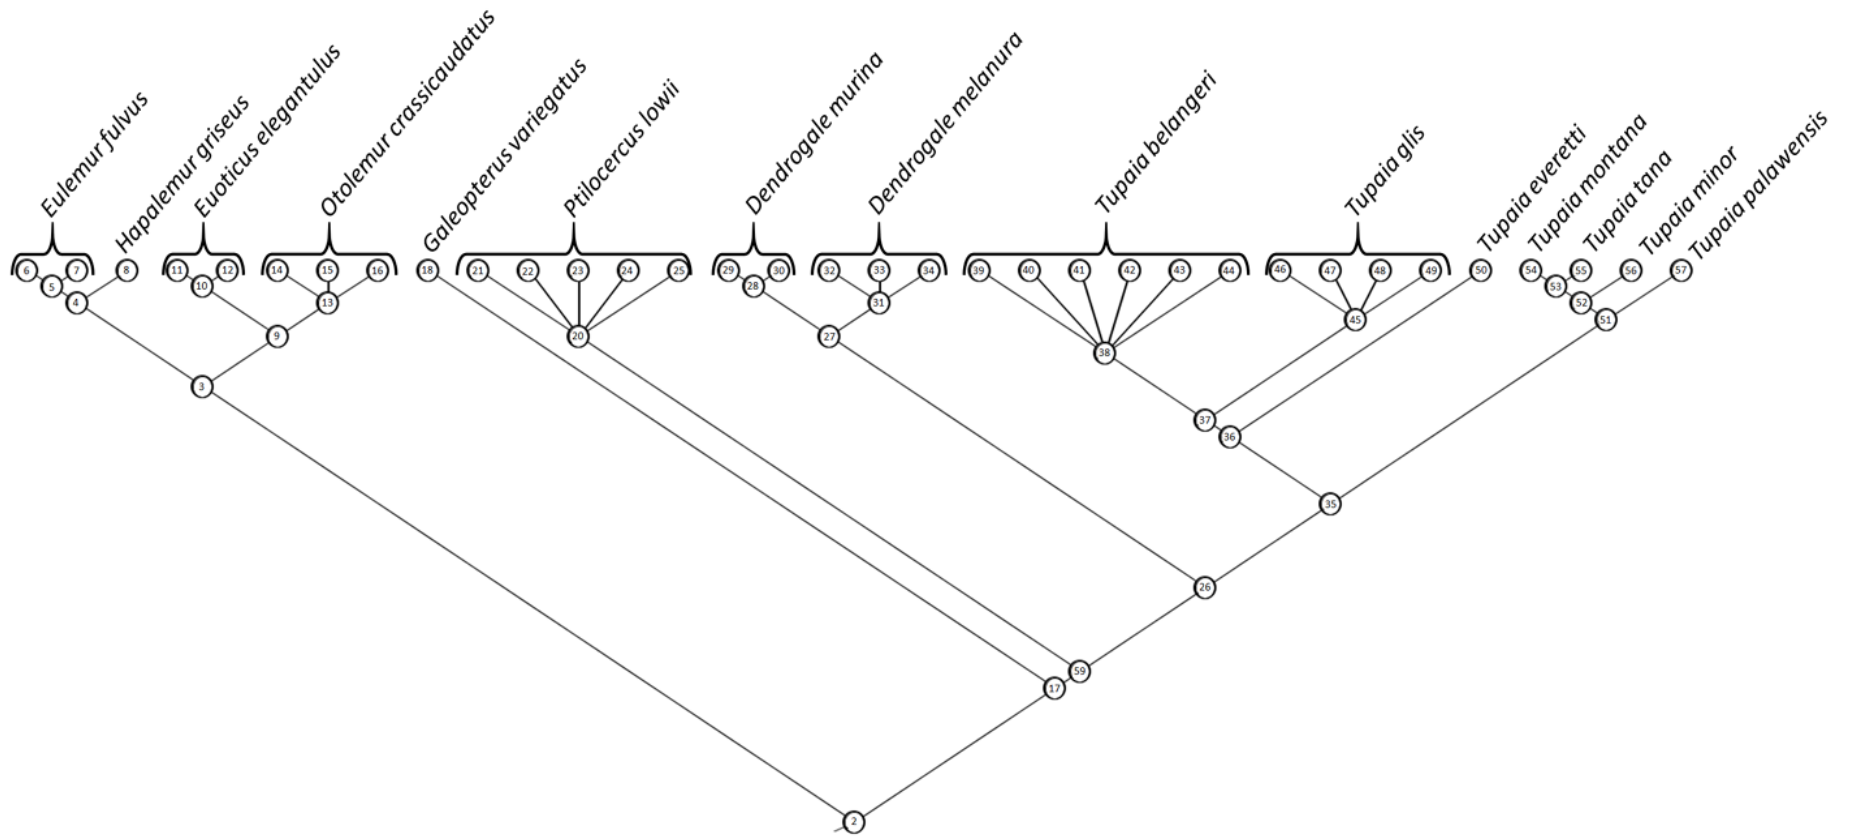

**Fig. S2** Phylogenetic relationships among selected euarchontans including Primatomorpha. Refer to Table S2 for reconstructed correlation coefficient ( $r$ ) at each node.

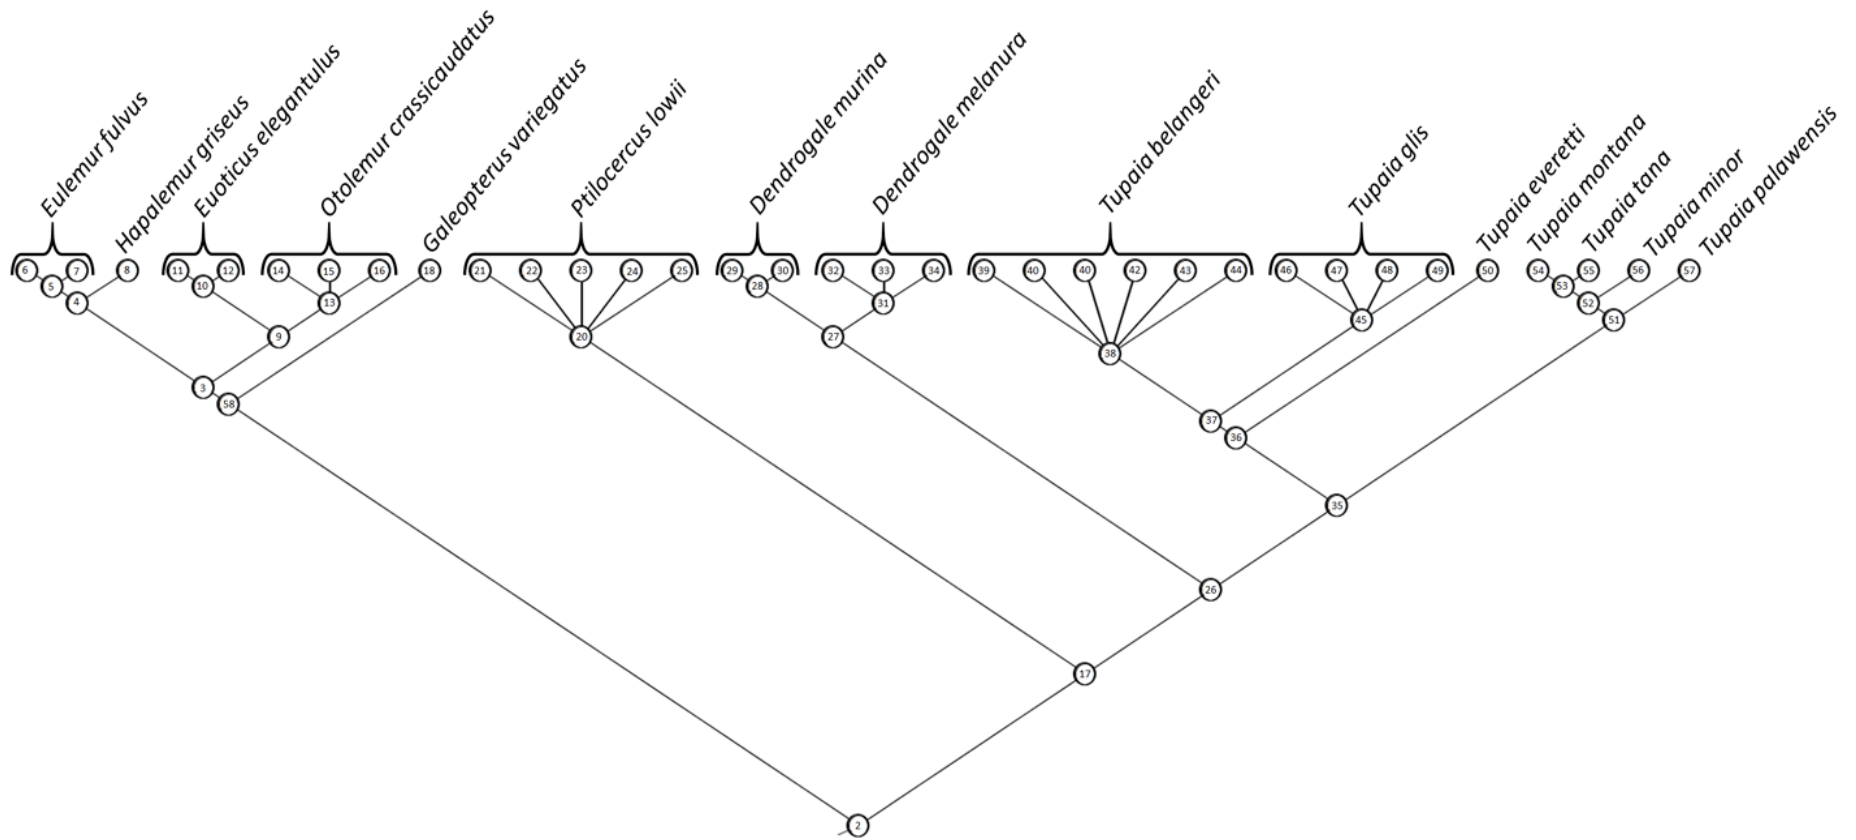

### References Cited

Grubb P, Butynski TM, Oates JF, Bearder SK, Disotell TR, Groves CP, Struhsaker TT, (2003) Assessment of the Diversity of African Primates. *Int. J. Primatol.* 24:1301–1357.
